# Supplementary material
Source: PubMed Central journal article supplement (PMC5884111)
Supplement: NIHMS940837-supplement-Supplemental_Data_File__doc__pdf__etc__.pdf [file NIHMS940837-supplement-Supplemental_Data_File__doc__pdf__etc__.pdf]

**Site Specific Genomic Alterations in a Well-Differentiated Pancreatic Neuroendocrine Tumor  
With High-Grade Progression**

| <b>SUPPLEMENTARY TABLE 1. Copy Number Gains as Assigned by the Ion Reporter CNV Calling Algorithm</b> |                 |                      |                       |                                             |
|-------------------------------------------------------------------------------------------------------|-----------------|----------------------|-----------------------|---------------------------------------------|
| <b>ISCN Names</b>                                                                                     | <b>Size, kb</b> | <b>Likely Ploidy</b> | <b>CNV Confidence</b> | <b>Genes in CNV region</b>                  |
| <b>PanNET high grade tumor area</b>                                                                   |                 |                      |                       |                                             |
| 7q21.2                                                                                                | 1004            | ×3                   | 42.10                 | AKAP9; CDK6; SAMD9                          |
| 4q22.1-q24                                                                                            | 18104           | ×3                   | 25.34                 | AFF1; NFKB1; TET2                           |
| 19q13.2                                                                                               | 11              | ×3                   | 25.33                 | CIC                                         |
| 3p22.1                                                                                                | 14              | ×3                   | 21.66                 | CTNNB1                                      |
| 17q25.3                                                                                               | 8               | ×3                   | 21.06                 | RNF213; LOC100294362                        |
| 8p11.21                                                                                               | 1               | ×3                   | 17.80                 | KAT6A                                       |
| 5q22.2                                                                                                | 9               | ×3                   | 17.68                 | APC                                         |
| 9p24.1-p22.3                                                                                          | 7134            | ×3                   | 17.43                 | PTPRD; PSIP1                                |
| 9q33.1-q34.12                                                                                         | 13263           | ×3                   | 16.66                 | TLR4; ABL1                                  |
| 5q35.2-q35.3                                                                                          | 149             | ×3                   | 16.13                 | FGFR4; NSD1                                 |
| 13q33.1                                                                                               | 1               | ×7                   | 14.33                 | ERCC5                                       |
| 14q32.31                                                                                              | 4               | ×3                   | 13.24                 | HSP90AA1                                    |
| 8q22.3                                                                                                | 32              | ×3                   | 13.10                 | UBR5                                        |
| <b>PanNET low grade tumor area</b>                                                                    |                 |                      |                       |                                             |
| 14q32.13-q32.33                                                                                       | 9702            | ×3                   | 242.30                | DICER1; TCL1A; BCL11B; HSP90AA1; AKT1       |
| 8p11.23p11.21                                                                                         | 4479            | ×3                   | 60.40                 | GPR124; FGFR1; KAT6A; IKBKB                 |
| 17p13.1-p11.2                                                                                         | 9552            | ×3                   | 55.75                 | TP53; PER1; MIR6883; AURKB; FLCN            |
| 7q31.33-q36.1                                                                                         | 25691           | ×3                   | 55.66                 | GRM8; SMO; TRIM24; BRAF; EPHB6; EZH2; KMT2C |
| 9p21.3-p13.3                                                                                          | 13109           | ×3                   | 55.46                 | CDKN2A; CDKN2B-AS1; CDKN2B; TAF1L; FANCG    |
| 18q11.2-q21.1                                                                                         | 25160           | ×3                   | 47.87                 | ZNF521; CDH2; SMAD2; MBD1                   |
| 12q12-q13.12                                                                                          | 3140            | ×3                   | 38.46                 | ARID2; KMT2D                                |
| 4q13.1-q22.1                                                                                          | 25215           | ×3                   | 38.08                 | LPHN3; AFF1                                 |
| 3q27.3-q29                                                                                            | 8161            | ×3                   | 32.67                 | LOC100131635; BCL6; LPP; TNK2               |
| 4q12                                                                                                  | 449             | ×3                   | 29.80                 | PDGFRA; KIT                                 |
| 12q13.12-q13.2                                                                                        | 7044            | ×3                   | 29.24                 | KMT2D; ATF1; SMUG1; ERBB3                   |
| 3p11.1-q22.2                                                                                          | 45467           | ×3                   | 28.07                 | EPHA3; GATA2; EPHB1                         |
| 8q24.3                                                                                                | 6               | ×3                   | 27.46                 | RECQL4                                      |
| 3p22.2-p22.1                                                                                          | 4187            | ×3                   | 25.49                 | MLH1; ITGA9; ITGA9-AS1; MYD88; CTNNB1       |
